# Supplementary material
Source: PubMed Central journal article supplement (PMC7211023)
Supplement: 42003_2020_960_MOESM3_ESM.pdf [file 42003_2020_960_MOESM3_ESM.pdf]

**Additional Supplementary File**

**File name:** Supplementary Data 1

**Description:** Source data for Figures 1 to 6.
